# Supplementary material
Source: PubMed Central journal article supplement (PMC8603359)
Supplement: NIHMS1755590-supplement-si.pdf [file NIHMS1755590-supplement-si.pdf]

Supplementary information for

## **Dried protein structure revealed at the residue level by liquid-observed vapor exchange NMR**

Candice J. Crilly<sup>†</sup>, Julia A. Brom<sup>†</sup>, Mark E. Kowalewski<sup>†</sup>, Samantha Piszkiwicz<sup>†</sup>, Gary J. Pielak<sup>\*,†,‡,§,||</sup>

<sup>†</sup>Department of Chemistry, University of North Carolina at Chapel Hill (UNC-CH), <sup>‡</sup>Department of Biochemistry & Biophysics, UNC-CH, <sup>§</sup>Lineberger Cancer Center, UNC-CH, <sup>||</sup>Integrative Program for Biological and Genome Sciences, UNC-CH, Chapel Hill, NC

## Supplementary figures

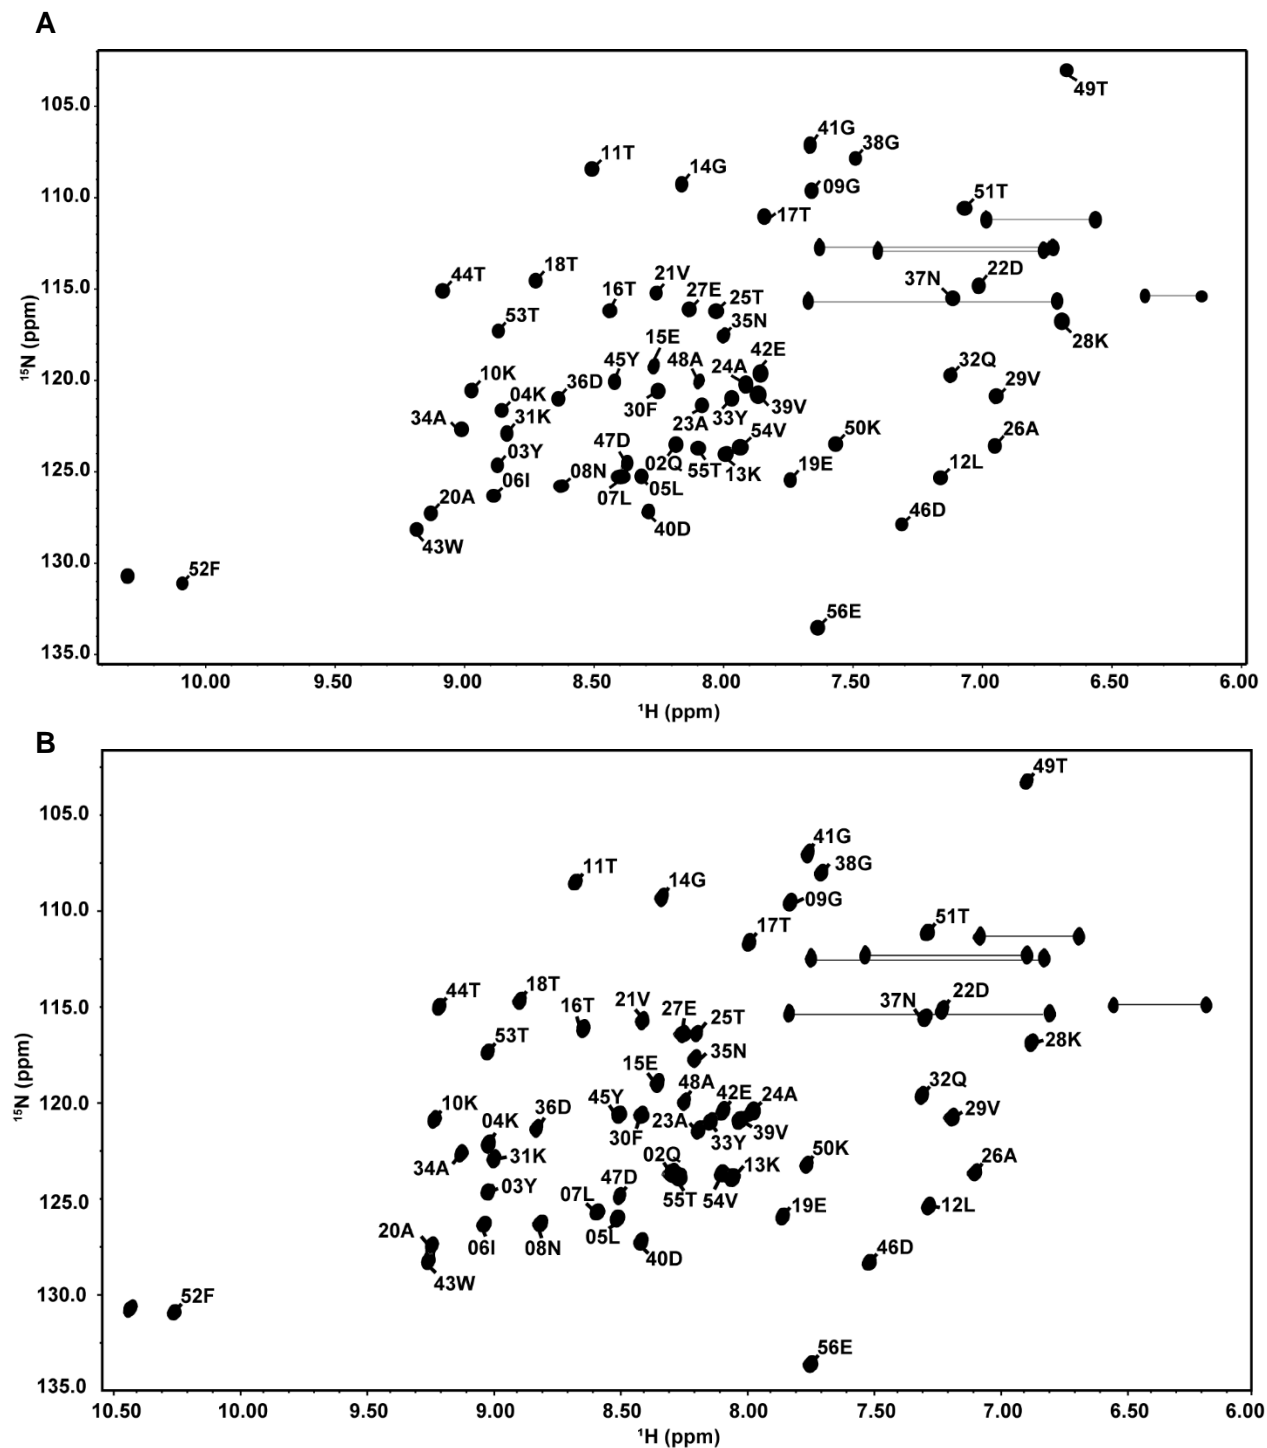

**Figure S1. Backbone resonance assignments of GB1 T2Q at A) 4 °C in 100-mM citrate buffer (10% D<sub>2</sub>O), pH 4.5 and B) 22 °C in 7.5 mM HEPES (10% D<sub>2</sub>O) pH 7.5.**

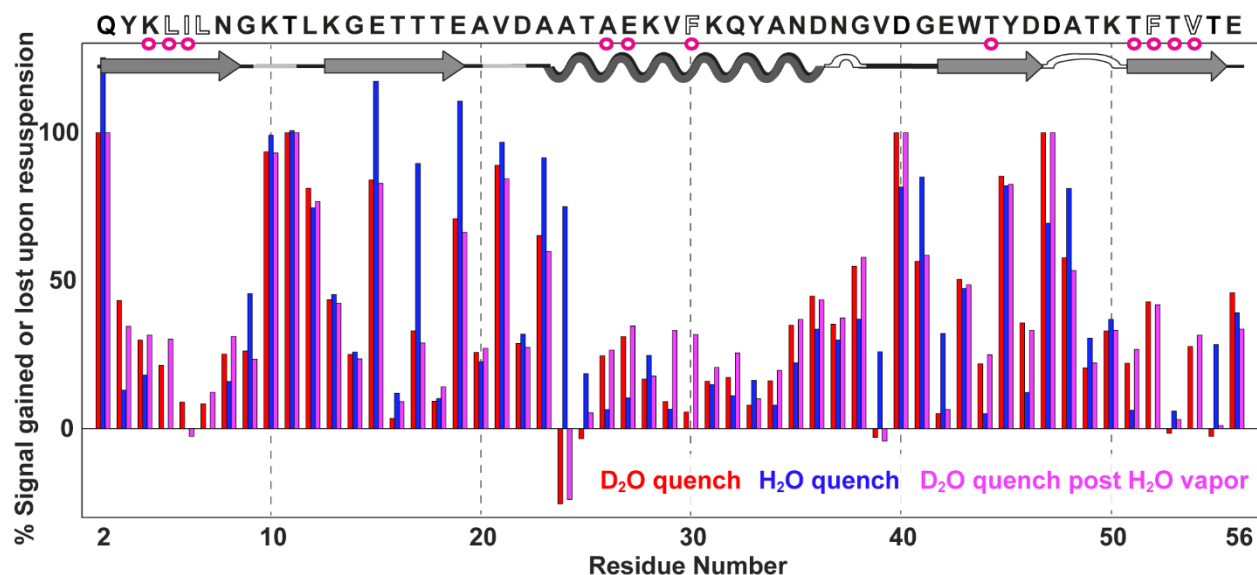

**Figure S2. Quench-label profiles of GB1 exposed to different vapor and buffer conditions.** The %quench-labelling experienced by a protonated (unexchanged) protein upon resuspension in D<sub>2</sub>O-based quench buffer (“D<sub>2</sub>O quench” values) is equivalent to the %signal lost upon resuspension, acquired and calculated as described in the main text. The %quench-labelling experienced by a sample of freeze-dried GB1 resuspended in D<sub>2</sub>O quench buffer after 24-h incubation in a H<sub>2</sub>O chamber at 75% relative humidity (achieved using a saturated NaCl solution – “D<sub>2</sub>O quench post H<sub>2</sub>O vapor” values) was determined in the same manner. To determine the %signal gained by a deuterium-exchanged protein upon resuspension in a H<sub>2</sub>O-quench buffer (“H<sub>2</sub>O quench” values), an aliquot of GB1 was twice exchanged into D<sub>2</sub>O, lyophilized for 24 h, and resuspended in cold H<sub>2</sub>O quench buffer before immediate HSQC spectrum acquisition; peak volumes were divided by the corresponding peak volumes of a fully protonated, non-exchanged sample ( $V_{T0}$ ) and multiplied by 100%. The primary and secondary structures of GB1 are plotted at the top, with open letters indicating residues for which no signal is detected for the H<sub>2</sub>O quenched sample. Measurements were made once for each condition.

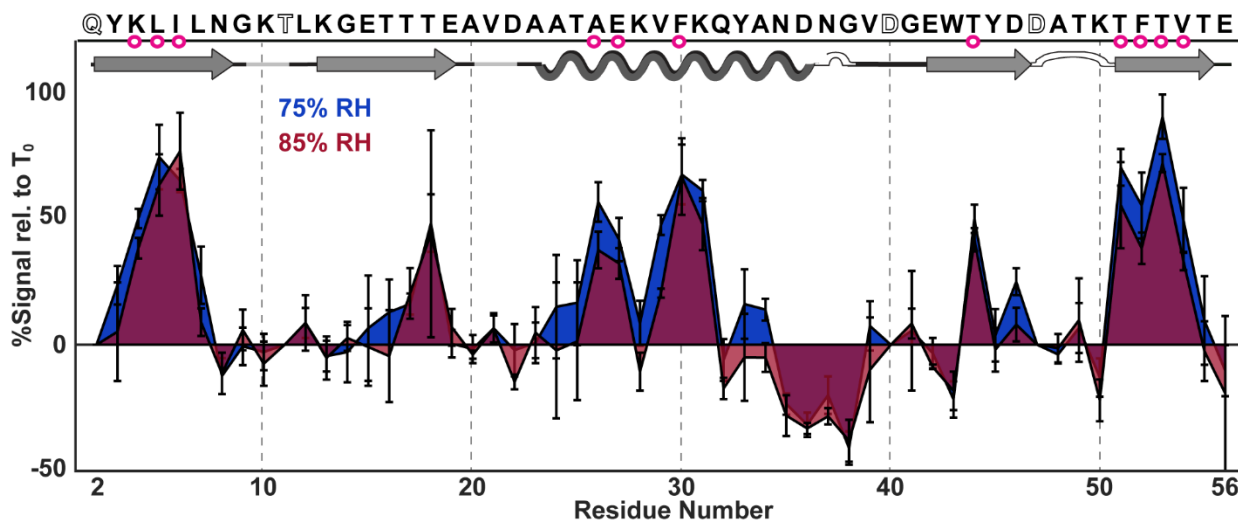

**Fig. S3. % Signal remaining as a function of GB1 residue after exposure to 75% - and 85%- RH ( $D_2O$ ) for 24 h.** GB1 was lyophilized in 1.5 mM HEPES, pH 6.5 for 24 h and then placed at 75- or 85- % RH ( $D_2O$ ) for 24 h before spectrum acquisition. Data were corrected for quench-labelling and normalized as described in Fig. 1. Primary and secondary structures are plotted at top, with pink circles indicating global unfolding residues and open letters indicating residues with undefined %signal remaining because they are 100% quench-labelled. Error bars represent uncertainty propagated from standard deviations of the mean from triplicate analysis.

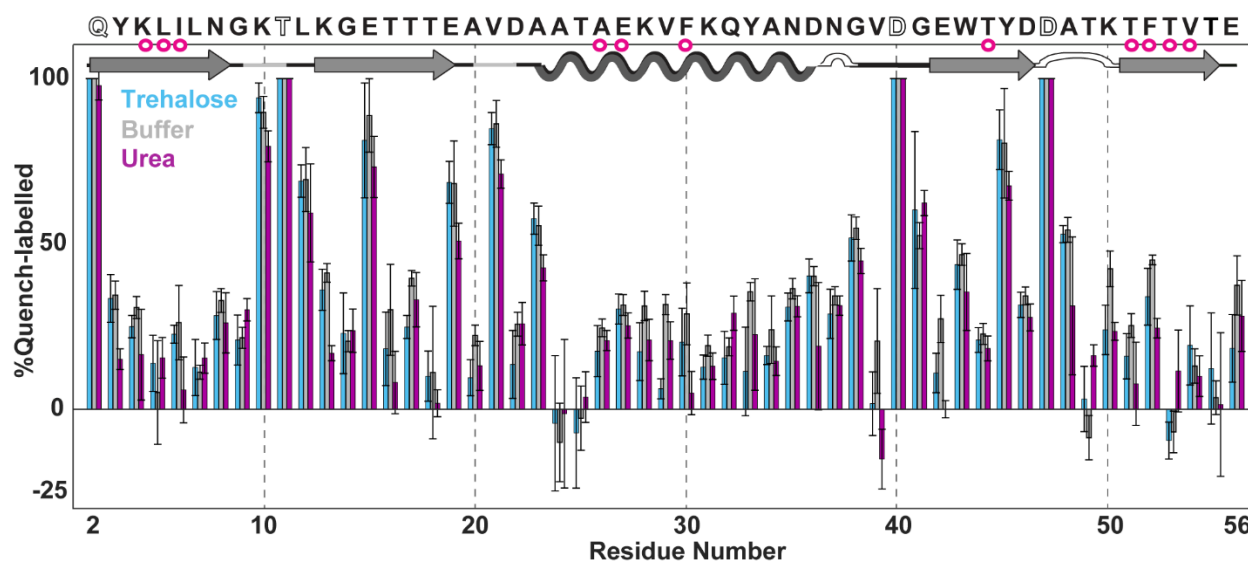

**Figure S4. % Quench-labelled as a function of residue and cosolute** plotted beneath a secondary structure map of GB1.  $^{15}N$ -enriched GB1 was lyophilized in 1.5-mM HEPES + 20 g/L trehalose or urea and analyzed (Fig. 1). Percent quench-labelled was calculated by dividing the quench correction value for each residue by the respective  $T_0$  volume ( $V_{T0}$ ). Error bars represent uncertainties propagated from standard deviations of the mean from triplicate analysis. Other details are given in the caption to Figure 3.

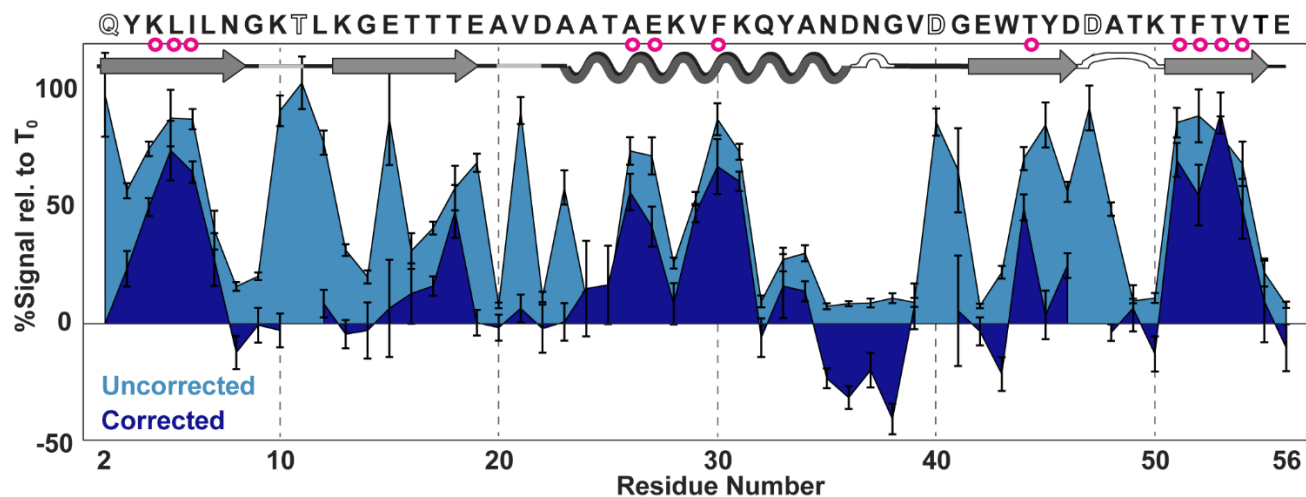

**Figure S5. LOVE profiles of GB1 before and after applying the quench-correction,** as described in the main text. Error bars represent uncertainty propagated from standard deviations of the mean from triplicate analysis. Other details are given in the caption to Figure 3.

## Supplementary Tables

**Table S1.**  $^{15}\text{N}$  and  $^1\text{H}$  chemical shifts of GB1 backbone amides at pH 4.5, 4 °C (blue, left) and pH 7.5, 22 °C (pink, right).

| Residue | $\delta^{15}\text{N}$ (ppm) | $\delta^1\text{H}$ (ppm) | $\delta^{15}\text{N}$ (ppm) | $\delta^1\text{H}$ (ppm) |
|---------|-----------------------------|--------------------------|-----------------------------|--------------------------|
| 02Q     | 123.5                       | 8.2                      | 123.6                       | 8.3                      |
| 03Y     | 124.6                       | 8.9                      | 124.6                       | 9.0                      |
| 04K     | 121.6                       | 8.9                      | 122.1                       | 9.0                      |
| 05L     | 125.2                       | 8.3                      | 126.0                       | 8.5                      |
| 06I     | 126.3                       | 8.9                      | 126.3                       | 9.0                      |
| 07L     | 125.3                       | 8.4                      | 125.7                       | 8.6                      |
| 08N     | 125.8                       | 8.6                      | 126.3                       | 8.8                      |
| 09G     | 109.6                       | 7.7                      | 109.5                       | 7.8                      |
| 10K     | 120.5                       | 9.0                      | 120.9                       | 9.2                      |
| 11T     | 108.4                       | 8.5                      | 108.5                       | 8.7                      |
| 12L     | 125.3                       | 7.2                      | 125.4                       | 7.3                      |
| 13K     | 124.0                       | 8.0                      | 123.9                       | 8.0                      |
| 14G     | 109.3                       | 8.2                      | 109.3                       | 8.3                      |
| 15E     | 119.2                       | 8.3                      | 119.0                       | 8.3                      |
| 16T     | 116.2                       | 8.4                      | 116.1                       | 8.6                      |
| 17T     | 111.0                       | 7.8                      | 111.6                       | 8.0                      |
| 18T     | 114.6                       | 8.7                      | 114.7                       | 8.9                      |
| 19E     | 125.4                       | 7.7                      | 125.9                       | 7.9                      |
| 20A     | 127.3                       | 9.1                      | 127.4                       | 9.2                      |
| 21V     | 115.2                       | 8.3                      | 115.7                       | 8.4                      |
| 22D     | 114.8                       | 7.0                      | 115.2                       | 7.2                      |
| 23A     | 121.4                       | 8.1                      | 121.4                       | 8.2                      |
| 24A     | 120.2                       | 7.9                      | 120.5                       | 8.0                      |
| 25T     | 116.2                       | 8.0                      | 116.4                       | 8.2                      |
| 26A     | 123.6                       | 7.0                      | 123.6                       | 7.1                      |
| 27E     | 116.1                       | 8.1                      | 116.4                       | 8.2                      |
| 28K     | 116.7                       | 6.7                      | 116.9                       | 6.9                      |
| 29V     | 120.8                       | 6.9                      | 120.8                       | 7.2                      |
| 30F     | 120.6                       | 8.3                      | 120.6                       | 8.4                      |
| 31K     | 122.9                       | 8.8                      | 122.9                       | 9.0                      |
| 32Q     | 119.7                       | 7.1                      | 119.6                       | 7.3                      |
| 33Y     | 121.0                       | 8.0                      | 121.0                       | 8.1                      |
| 34A     | 122.7                       | 9.0                      | 122.6                       | 9.1                      |
| 35N     | 117.6                       | 8.0                      | 117.7                       | 8.2                      |
| 36D     | 121.0                       | 8.6                      | 121.4                       | 8.8                      |
| 37N     | 115.5                       | 7.1                      | 115.6                       | 7.3                      |
| 38G     | 107.8                       | 7.5                      | 108.0                       | 7.7                      |
| 39V     | 120.8                       | 7.9                      | 120.9                       | 8.0                      |
| 40D     | 127.2                       | 8.3                      | 127.2                       | 8.4                      |
| 41G     | 107.1                       | 7.7                      | 107.0                       | 7.8                      |
| 42E     | 119.6                       | 7.9                      | 120.4                       | 8.1                      |
| 43W     | 128.2                       | 9.2                      | 128.3                       | 9.2                      |
| 44T     | 115.1                       | 9.1                      | 115.0                       | 9.2                      |
| 45Y     | 120.1                       | 8.4                      | 120.6                       | 8.5                      |
| 46D     | 127.9                       | 7.3                      | 128.3                       | 7.5                      |
| 47D     | 124.5                       | 8.4                      | 124.8                       | 8.5                      |
| 48A     | 120.0                       | 8.1                      | 120.0                       | 8.2                      |
| 49T     | 103.0                       | 6.7                      | 103.3                       | 6.9                      |
| 50K     | 123.5                       | 7.6                      | 123.2                       | 7.8                      |
| 51T     | 110.6                       | 7.1                      | 111.1                       | 7.3                      |
| 52F     | 131.1                       | 10.1                     | 130.9                       | 10.3                     |
| 53T     | 117.3                       | 8.9                      | 117.3                       | 9.0                      |
| 54V     | 123.7                       | 7.9                      | 123.7                       | 8.1                      |
| 55T     | 123.7                       | 8.1                      | 123.8                       | 8.3                      |
| 56E     | 133.5                       | 7.6                      | 133.6                       | 7.7                      |

**Table S2. Signal change of T<sub>24</sub> due to solution HDX during LOVE NMR spectrum acquisition\***

| <b>Residue<sup>†</sup></b> | <b>%Signal 0 h<sup>‡</sup></b> | <b>%Signal 12 h<sup>‡</sup></b> | <b>%Change in 12 h<sup>‡</sup></b> | <b>%Signal change during expt<sup>§</sup></b> |
|----------------------------|--------------------------------|---------------------------------|------------------------------------|-----------------------------------------------|
| <b>N8</b>                  | 19                             | 60                              | 41                                 | 2                                             |
| <b>G9</b>                  | 27                             | 78                              | 51                                 | 6                                             |
| <b>K13</b>                 | 42                             | 84                              | 42                                 | 10                                            |
| <b>G14</b>                 | 17                             | 51                              | 34                                 | 2                                             |
| <b>T17</b>                 | 30                             | 47                              | 18                                 | 13                                            |
| <b>E19</b>                 | 83                             | 96                              | 12                                 | 24                                            |
| <b>D22</b>                 | 14                             | 51                              | 37                                 | 2                                             |
| <b>A23</b>                 | 71                             | 92                              | 21                                 | 18                                            |
| <b>A24</b>                 | 23                             | 88                              | 65                                 | 4                                             |
| <b>D36</b>                 | 12                             | 35                              | 23                                 | 1                                             |
| <b>N37</b>                 | 11                             | 25                              | 14                                 | 1                                             |
| <b>G38</b>                 | 12                             | 47                              | 35                                 | 2                                             |
| <b>G41</b>                 | 68                             | 79                              | 11                                 | 26                                            |
| <b>W43</b>                 | 31                             | 85                              | 54                                 | 4                                             |
| <b>A48</b>                 | 73                             | 94                              | 22                                 | 24                                            |
| <b>T49</b>                 | 13                             | 56                              | 43                                 | 2                                             |
| <b>E56</b>                 | 11                             | 44                              | 33                                 | 2                                             |

\*Determined by taking serial HSQCs of T<sub>24</sub> over 12 h period, at pH 4.5 and 4 °C. The majority of signal gain by T<sub>24</sub> is accounted for by the quench correction, because D<sub>0</sub> witnesses a similar degree of signal loss due to solution HDX.

<sup>†</sup>Only residues that witness a change in signal >10% in 12 h are shown

<sup>‡</sup>Percent is defined relative to average T<sub>0</sub> signal for that residue, and is not corrected for quench-labelling

<sup>§</sup>Calculated from the experimentally-determined observed rate constant (*k<sub>obs</sub>*) obtained by fitting normalized data to the equation %Signal = 100\*(1-e<sup>-*k<sub>obs</sub>*\**t*</sup>), where *t* is time between resuspension and completion of spectrum acquisition (30 minutes for all LOVE NMR experiments performed for this manuscript)

**Table S3. Freeze-dried protein water content**

| Condition         | Initial mass <sup>†</sup><br>(mg) | Final mass <sup>†</sup><br>(mg) | %H <sub>2</sub> O at<br>0 h (w/w) | %(H <sub>2</sub> O + D <sub>2</sub> O) at<br>72 h (w/w) | %SASA covered by<br>H <sub>2</sub> O + D <sub>2</sub> O at 72 h <sup>§</sup> |
|-------------------|-----------------------------------|---------------------------------|-----------------------------------|---------------------------------------------------------|------------------------------------------------------------------------------|
| <b>Buffer</b>     | 2.6                               | 2.8                             | 10                                | 19                                                      | 40                                                                           |
| <b>+Urea</b>      | 15.6                              | 16.0                            | 2                                 | 5                                                       | 60                                                                           |
| <b>+Trehalose</b> | 16.1                              | 17.4                            | 5                                 | 12                                                      | 170                                                                          |

<sup>†</sup>Assumes no sample lost during lyophilization or transfer to TGA instrument.

$$\text{Mass} = \text{Total mass measured by TGA} \times \frac{\text{Theoretical dry mass}}{\text{Measured dry mass}}$$

<sup>§</sup>Calculated by multiplying the molar ratio of bound H<sub>2</sub>O to protein by the average amount of protein surface covered by a water molecule (20 Å<sup>2</sup>)<sup>1</sup> and dividing by the surface area of the native solution structure of GB1 (3727 Å<sup>2</sup>), as determined by the PyMOL get\_area function for PDB 2QMT.



**Table S4. Average %Protected values of GB1 lyophilized in buffer only or with cosolutes**

| Residue | %Protected ± SEM† |                    |               |
|---------|-------------------|--------------------|---------------|
|         | Buffer            | + 20 g/L trehalose | + 20 g/L urea |
| 02Q     | N/A               | N/A                | N/A           |
| 03Y     | 20 ± 10           | *66 ± 7            | 17 ± 3        |
| 04K     | 50 ± 4            | *69 ± 6            | 20 ± 10       |
| 05L     | 70 ± 10           | *100 ± 30          | 16 ± 7        |
| 06I     | 65 ± 5            | *80 ± 20           | 30 ± 10       |
| 07L     | 30 ± 10           | 82 ± 5             | 13 ± 5        |
| 08N     | -12 ± 7           | -9 ± 4             | -11 ± 9       |
| 09G     | -1 ± 7            | 1 ± 4              | -11 ± 4       |
| 10K     | -3 ± 7            | -3 ± 8             | 11 ± 4        |
| 11T     | N/A               | N/A                | N/A           |
| 12L     | 9 ± 6             | 7 ± 10             | 20 ± 20       |
| 13K     | -5 ± 6            | -11 ± 4            | 19 ± 2        |
| 14G     | 0 ± 10            | -1 ± 4             | -2 ± 7        |
| 15E     | 10 ± 20           | 0 ± 10             | 30 ± 10       |
| 16T     | 10 ± 10           | 0 ± 12             | 10 ± 10       |
| 17T     | 16 ± 4            | 2 ± 5              | -13 ± 8       |
| 18T     | 50 ± 10           | *80 ± 30           | 27 ± 4        |
| 19E     | 0 ± 5             | 2 ± 7              | 20 ± 20       |
| 20A     | -2 ± 6            | -13 ± 4            | -4 ± 8        |
| 21V     | 7 ± 6             | 9 ± 7              | 24 ± 4        |
| 22D     | 0 ± 10            | -13 ± 5            | -14 ± 6       |
| 23A     | 1 ± 8             | 4 ± 6              | 16 ± 4        |
| 24A     | 20 ± 20           | *30 ± 10           | 20 ± 20       |
| 25T     | 20 ± 20           | 15 ± 6             | 4 ± 8         |
| 26A     | 60 ± 10           | *84 ± 5            | 14 ± 3        |
| 27E     | 40 ± 10           | *70 ± 5            | 10 ± 4        |
| 28K     | 9 ± 9             | 56 ± 7             | -2 ± 7        |
| 29V     | 47 ± 4            | *66 ± 6            | *3 ± 6        |
| 30F     | 70 ± 10           | *70 ± 10           | 37 ± 7        |
| 31K     | 61 ± 5            | *85 ± 7            | 22 ± 4        |
| 32Q     | -6 ± 8            | 46 ± 6             | -23 ± 5       |
| 33Y     | 20 ± 10           | *61 ± 5            | 0 ± 20        |
| 34A     | 14 ± 4            | 50 ± 20            | -1 ± 4        |
| 35N     | -23 ± 4           | -7 ± 9             | -24 ± 4       |
| 36D     | -32 ± 5           | -30 ± 4            | 0 ± 20        |
| 37N     | -20 ± 8           | -15 ± 5            | -22 ± 3       |
| 38G     | -41 ± 7           | -41 ± 4            | -34 ± 4       |
| 39V     | 10 ± 10           | 50 ± 30            | 27 ± 9        |
| 40D     | N/A               | N/A                | N/A           |
| 41G     | 0 ± 20            | 9 ± 5              | -30 ± 3       |
| 42E     | -3 ± 6            | 20 ± 10            | 8 ± 3         |
| 43W     | -22 ± 7           | -22 ± 5            | -10 ± 10      |
| 44T     | 50 ± 6            | *77 ± 6            | 15 ± 4        |
| 45Y     | 0 ± 10            | 0 ± 10             | 0 ± 4         |
| 46D     | 25 ± 5            | *60 ± 6            | 3 ± 4         |
| 47D     | N/A               | N/A                | N/A           |
| 48A     | -4 ± 4            | -6 ± 5             | 30 ± 20       |
| 49T     | 10 ± 10           | 22 ± 6             | 3 ± 5         |
| 50K     | -13 ± 8           | -25 ± 3            | -14 ± 3       |
| 51T     | 70 ± 9            | *78 ± 7            | 30 ± 10       |
| 52F     | 60 ± 10           | *56 ± 3            | 9 ± 3         |
| 53T     | 90 ± 10           | *107 ± 8           | 30 ± 10       |
| 54V     | 50 ± 10           | *85 ± 6            | 21 ± 7        |
| 55T     | 10 ± 20           | *98 ± 9            | 30 ± 20       |
| 56E     | -10 ± 10          | -7 ± 8             | -20 ± 10      |

\*V<sub>T24</sub> = V<sub>T0</sub> (i.e. vapor exchange was not observable).

†Standard error of the mean propagated from standard errors of the mean from triplicate analysis of each dataset used to calculate %Protected (T<sub>0</sub>, D<sub>0</sub>, and T<sub>24</sub>).

**Table S5. Average free energies of opening in solution ( $\Delta G_{op}^{oi}$ )<sup>§</sup>**

| Residue | $\Delta G_{op}^{oi} \pm \text{SEM}^\ddagger$ (kcal/mol) |                     |                |
|---------|---------------------------------------------------------|---------------------|----------------|
|         | Buffer                                                  | + 100 g/L trehalose | + 100 g/L urea |
| 02Q     | N/A                                                     | N/A                 | N/A            |
| 03Y     | 7.59 ± 0.01                                             | 7.83 ± 0.02         | 6.46 ± 0.01    |
| 04K     | 8.19 ± 0.01                                             | 8.52 ± 0.01         | N/A            |
| 05L     | 8.13 ± 0.00                                             | 8.48 ± 0.01         | 6.61 ± 0.01    |
| 06I     | 8.11 ± 0.02                                             | 8.21 ± 0.02         | 6.46 ± 0.03    |
| 07L     | 6.16 ± 0.04                                             | 6.26 ± 0.03         | 5.68 ± 0.01    |
| 08N     | 5.25 ± 0.01                                             | 5.23 ± 0.02         | 4.74 ± 0.01    |
| 09G     | 4.84 ± 0.03                                             | 4.80 ± 0.02**       | N/A            |
| 10K     | N/A                                                     | N/A                 | N/A            |
| 11T     | N/A                                                     | N/A                 | N/A            |
| 12L     | N/A                                                     | N/A                 | N/A            |
| 13K     | N/A                                                     | N/A                 | N/A            |
| 14G     | 4.55 ± 0.03                                             | 4.61 ± 0.02**       | N/A            |
| 15E     | N/A                                                     | N/A                 | N/A            |
| 16T     | 5.34 ± 0.02                                             | 5.28 ± 0.08         | 4.627 ± 0.004  |
| 17T     | N/A                                                     | N/A                 | N/A            |
| 18T     | 7.00 ± 0.04                                             | 7.15 ± 0.02         | 6.52 ± 0.01    |
| 19E     | N/A                                                     | N/A                 | N/A            |
| 20A     | 4.81 ± 0.01                                             | 4.79 ± 0.04         | 3.96 ± .02**   |
| 21V     | N/A                                                     | N/A                 | N/A            |
| 22D     | N/A                                                     | N/A                 | N/A            |
| 23A     | N/A                                                     | N/A                 | N/A            |
| 24A     | N/A                                                     | N/A                 | N/A            |
| 25T     | 4.46 ± 0.02                                             | 4.46 ± 0.01         | N/A            |
| 26A     | 8.62 ± 0.01                                             | 8.78 ± 0.00         | 7.42 ± 0.01    |
| 27E     | 8.43 ± 0.01                                             | 8.61 ± 0.00         | 6.97 ± 0.01    |
| 28K     | 5.89 ± 0.03                                             | 5.96 ± 0.03         | 5.72 ± 0.01    |
| 29V     | 5.84 ± 0.03                                             | 5.93 ± 0.04         | 5.74 ± 0.01    |
| 30F     | 8.53 ± 0.01                                             | 8.75 ± 0.00         | 6.96 ± 0.01    |
| 31K     | 8.65 ± 0.00                                             | 8.90 ± 0.01         | 6.99 ± 0.01    |
| 32Q     | 5.55 ± 0.04                                             | 5.63 ± 0.03         | 5.43 ± 0.00    |
| 33Y     | 6.61 ± 0.04                                             | 6.67 ± 0.02         | 6.29 ± 0.01    |
| 34A     | 7.36 ± 0.02                                             | 7.526 ± 0.003       | 6.78 ± 0.01    |
| 35N     | 6.97 ± 0.04                                             | 7.03 ± 0.05         | 6.55 ± 0.01    |
| 36D     | 5.60 ± 0.04                                             | 5.65 ± 0.02         | 5.39 ± 0.02    |
| 37N     | 6.30 ± 0.03                                             | 6.37 ± 0.03         | 6.07 ± 0.02    |
| 38G     | 4.91*                                                   | 4.99 ± 0.04**       | N/A            |
| 39V     | 6.11 ± 0.03                                             | 6.23 ± 0.02         | 5.89 ± 0.01    |
| 40D     | 3.47 ± 0.03                                             | 3.49 ± 0.03**       | N/A            |
| 41G     | N/A                                                     | N/A                 | N/A            |
| 42E     | 5.45 ± 0.04                                             | 5.54 ± 0.03         | 5.36 ± 0.01    |
| 43W     | N/A                                                     | N/A                 | N/A            |
| 44T     | 8.755 ± 0.003                                           | 8.89 ± 0.01         | 7.32 ± 0.01    |
| 45Y     | N/A                                                     | N/A                 | N/A            |
| 46D     | 7.60 ± 0.01                                             | 7.69 ± 0.01         | 7.00 ± 0.01    |
| 47D     | N/A                                                     | N/A                 | N/A            |
| 48A     | N/A                                                     | N/A                 | N/A            |
| 49T     | N/A                                                     | N/A                 | N/A            |
| 50K     | 5.70 ± 0.03                                             | 5.76 ± 0.03         | 5.58 ± 0.01    |
| 51T     | 8.64 ± 0.01                                             | 8.93 ± 0.00         | 7.20 ± 0.01    |
| 52F     | 8.64 ± 0.01                                             | 8.95 ± 0.01         | 7.15 ± 0.01    |
| 53T     | 8.61 ± 0.00                                             | 8.90 ± 0.01         | 7.05 ± 0.01    |
| 54V     | 8.33 ± 0.00                                             | 8.66 ± 0.00         | 6.87 ± 0.02    |
| 55T     | 6.83 ± 0.04                                             | 6.96 ± 0.03         | 6.48 ± 0.01    |
| 56E     | 2.90 ± 0.03                                             | 2.96 ± 0.03         | 2.88 ± 0.01    |

Footnotes

<sup>§</sup>  $\Delta G_{op}^{oi}$  values from NMR-detected solution H-D exchange at 22 °C, pH 7.5.

<sup>‡</sup> Standard error of the mean from triplicate analysis. Stars mark residues for which only \*one or \*\*two measurements were made.

**Table S6. Correlations between residue-specific predictors and  $\Delta\%Protected_{buffer \rightarrow cosolute}$** 

| <i>Predictor</i> <sup>†</sup>                                      | $\Delta\%Protected_{buffer \rightarrow trehalose}$ |                       | $\Delta\%Protected_{buffer \rightarrow urea}$ |                       |
|--------------------------------------------------------------------|----------------------------------------------------|-----------------------|-----------------------------------------------|-----------------------|
|                                                                    | <i>Coeff.</i>                                      | <i>R</i> <sup>2</sup> | <i>Coeff.</i>                                 | <i>R</i> <sup>2</sup> |
| SASA <sub>backbone</sub>                                           | -                                                  | 0.15                  | +                                             | 0.25                  |
| CASA <sub>backbone</sub>                                           | -                                                  | 0.14                  | +                                             | 0.25                  |
| $\Delta$ SASA <sub>U<math>\rightarrow</math>F</sub>                | -                                                  | 0.08                  | +                                             | 0.25                  |
| # H-bonds                                                          | +                                                  | 0.07                  | -                                             | 0.14                  |
| # H-bonds with water                                               | -                                                  | 0.06                  | +                                             | 0.08                  |
| # Weak H-bonds with water                                          | -                                                  | 0.06                  | +                                             | 0.01                  |
| k <sub>int</sub> (pH 4.5)                                          | -                                                  | 0.05                  | +                                             | 0.03                  |
| # Highly frustrated contacts                                       | +                                                  | 0.04                  | -                                             | 0.00                  |
| # Ionic interactions                                               | -                                                  | 0.03                  | +                                             | 0.00                  |
| # Minimally frustrated contacts                                    | +                                                  | 0.03                  | -                                             | 0.03                  |
| # Aromatic contacts                                                | -                                                  | 0.02                  | -                                             | 0.03                  |
| # Neutral frustrated contacts                                      | +                                                  | 0.02                  | -                                             | 0.02                  |
| CASA <sub>apolar</sub>                                             | -                                                  | 0.02                  | +                                             | 0.12                  |
| k <sub>int</sub> (pH 7.0)                                          | -                                                  | 0.02                  | +                                             | 0.00                  |
| # Weak H-bonds                                                     | +                                                  | 0.02                  | -                                             | 0.08                  |
| CASA <sub>total</sub>                                              | -                                                  | 0.02                  | +                                             | 0.22                  |
| SASA <sub>total</sub>                                              | -                                                  | 0.02                  | +                                             | 0.21                  |
| $\Delta G^{\circ}_{tr, Octanol \rightarrow H_2O}$                  | +                                                  | 0.02                  | -                                             | 0.06                  |
| SASA <sub>polar</sub>                                              | -                                                  | 0.01                  | +                                             | 0.16                  |
| # Carbonyl interactions                                            | +                                                  | 0.01                  | -                                             | 0.18                  |
| SASA ratio (polar:nonpolar)                                        | -                                                  | 0.01                  | +                                             | 0.03                  |
| SASA <sub>apolar</sub>                                             | -                                                  | 0.01                  | +                                             | 0.11                  |
| $\Delta G^{\circ}_{tr, Cyclohexane \rightarrow H_2O}$              | +                                                  | 0.01                  | -                                             | <.01                  |
| $\Delta G^{\circ}_{tr, NMA \rightarrow H_2O}$ (normalized)         | -                                                  | 0.01                  | +                                             | <.01                  |
| $\Delta G^{\circ}_{tr, EtOH \rightarrow H_2O}$ (normalized)        | -                                                  | < 0.01                | +                                             | <.01                  |
| $\Delta G^{\circ}_{tr, EtOH \rightarrow H_2O}$                     | +                                                  | < 0.01                | -                                             | 0.07                  |
| $\Delta G^{\circ}_{tr, vapor \rightarrow H_2O}$ (normalized)       | +                                                  | < 0.01                | +                                             | <.01                  |
| $\Delta G^{\circ}_{tr, NMA \rightarrow H_2O}$                      | +                                                  | < 0.01                | -                                             | 0.03                  |
| Net frustration parameter                                          | +                                                  | < 0.01                | -                                             | 0.02                  |
| # Hydrophobic contacts                                             | +                                                  | < 0.01                | -                                             | 0.09                  |
| $\Delta G^{\circ}_{tr, Cyclohexane \rightarrow H_2O}$ (normalized) | -                                                  | < 0.01                | -                                             | 0.04                  |
| CASA <sub>polar</sub>                                              | -                                                  | < 0.01                | +                                             | 0.15                  |
| CASA <sub>sidechain</sub>                                          | -                                                  | < 0.01                | +                                             | 0.10                  |
| $\Delta G^{\circ}_{tr, vapor \rightarrow H_2O}$                    | -                                                  | < 0.01                | +                                             | 0.01                  |
| $\Delta G^{\circ}_{tr, Octanol \rightarrow H_2O}$ (normalized)     | +                                                  | < 0.01                | +                                             | <.01                  |
| SASA <sub>sidechain</sub>                                          | +                                                  | < 0.01                | +                                             | 0.09                  |

<sup>†</sup>Predictor values are calculated using the native structure of GB1 (PDB 2QMT), with the exception of non-normalized transfer free energies ( $\Delta G^{\circ}_{tr}$ ). The specific types of intra- and inter-molecular contacts (H-bonds, carbonyl interactions, etc.) were obtained from the Arpeggio server.<sup>2</sup> Solvent-accessible surface areas (SASA), cosolute-accessible surface areas (CASA), and change in surface area upon folding ( $\Delta$ SASA<sub>U $\rightarrow$ F</sub>) were obtained from the ProtSA server using a probe radius of 1.40-, 4.00-, and 1.85- Å for water, trehalose, and urea, respectively.<sup>3</sup> Frustration parameters are from the Frustratometer server.<sup>4</sup> Transfer free energies of amino acid side chains are from.<sup>5-6</sup> Normalized transfer free energies were calculated by multiplying literature values by the fraction of sidechain area accessible to solvent in the native structure.

## References

- (1) Rupley, J. A., Gratton, E., and Careri, G. (1983) Water and globular proteins, *Trends Biochem. Sci.* 8, 18-22.
- (2) Jubb, H. C., Higuero, A. P., Ochoa-Montano, B., Pitt, W. R., Ascher, D. B., and Blundell, T. L. (2017) Arpeggio: A web server for calculating and visualising interatomic interactions in protein structures, *J. Mol. Biol.* 429, 365-371.
- (3) Estrada, J., Bernado, P., Blackledge, M., and Sancho, J. (2009) ProtSA: A web application for calculating sequence specific protein solvent accessibilities in the unfolded ensemble, *BMC Bioinf.* 10, 104.
- (4) Jenik, M., Parra, R. G., Radusky, L. G., Turjanski, A., Wolynes, P. G., and Ferreiro, D. U. (2012) Protein frustratometer: A tool to localize energetic frustration in protein molecules, *Nucleic Acids Res.* 40, W348-351.
- (5) Damodaran, S., and Song, K. B. (1986) The role of solvent polarity in the free energy of transfer of amino acid side chains from water to organic solvents, *J. Biol. Chem.* 261, 7220-7222.
- (6) Radzicka, A., and Wolfenden, R. (1988) Comparing the polarities of the amino acids: Side-chain distribution coefficients between the vapor phase, cyclohexane, 1-octanol, and neutral aqueous solution, *Biochemistry* 27, 1664-1670.
